# Supplementary material for: Reduced Graphene Oxide-Wrapped Novel CoIn2S4 Spinel Composite Anode Materials for Li-ion Batteries
Source: MDPI journal article supplement (doi:10.3390/nano12244367), 2022-12-07
Supplement: s1 [file s1]

## **Supporting Information**

### **Reduced graphene oxide-wrapped novel $\text{CoIn}_2\text{S}_4$ spinel composite anode materials for Li-ion batteries**

Ting-Yu Lee and Wei-Ren Liu\*

*Department of Chemical Engineering, R&D Center for Membrane Technology, Center for Circular Economy, Chung Yuan Christian University, 200 Chung Pei Road, Chung Li District, Taoyuan City 32023, Taiwan*

*\*Correspondence: [wrliu1203@gmail.com](mailto:wrliu1203@gmail.com); Tel.: +886-3-2653315; Fax: 886-3-2653399*

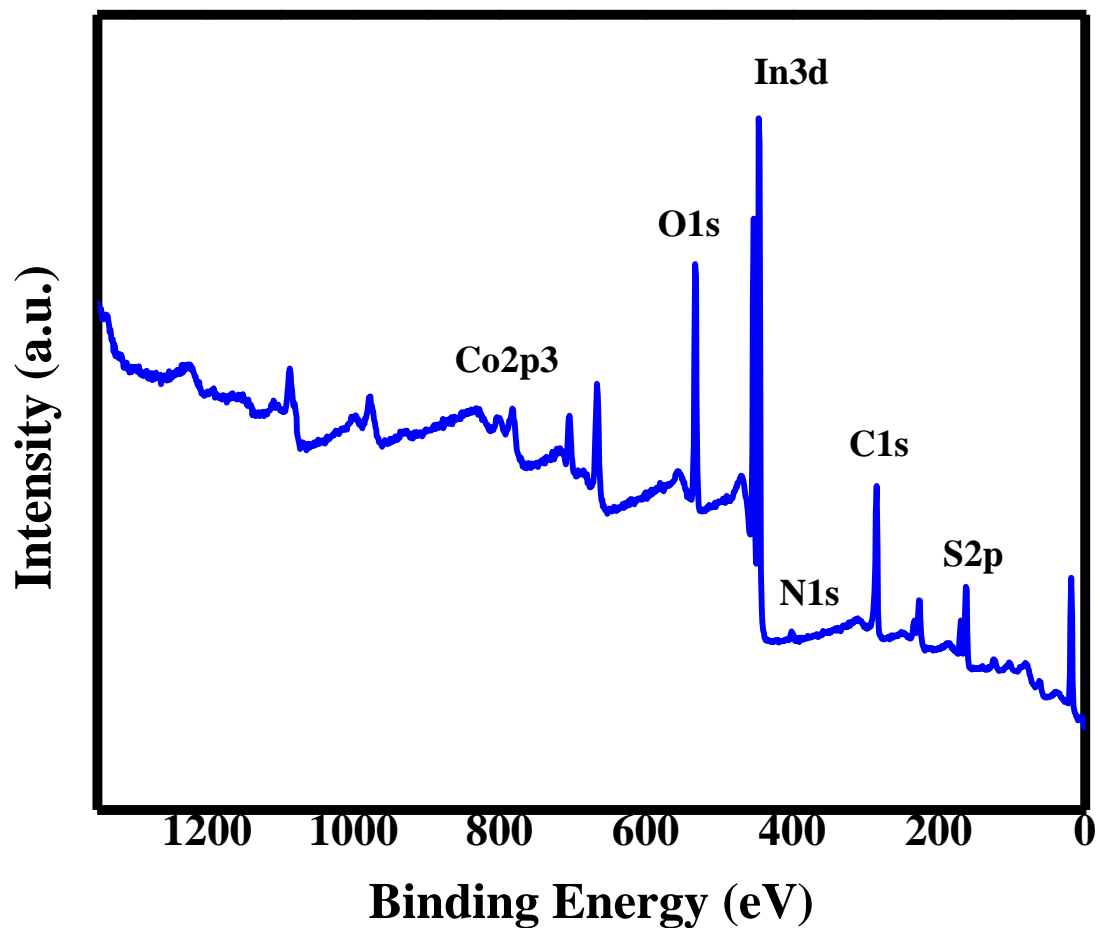

Figure S1. XPS survey of as-synthesized CoIn<sub>2</sub>S<sub>4</sub>/rGO composite

Table S1. Elemental analysis of CoIn<sub>2</sub>S<sub>4</sub>/rGO based on XPS survey.

| Element   | O1s   | In3d  | C1s   | S2p   | Co2p3 |
|-----------|-------|-------|-------|-------|-------|
| Atomic(%) | 20.90 | 7.54  | 54.25 | 14.20 | 3.74  |
| Weight(%) | 13.24 | 34.29 | 25.78 | 18.00 | 8.73  |
